# Supplementary material for: Comparative Plasma Lipidome between Human and Cynomolgus Monkey: Are Plasma Polar Lipids Good Biomarkers for Diabetic Monkeys?
Source: PubMed Central journal article supplement (PMC3087804; doi:10.1371/journal.pone.0019731), 2011-05-04

Figure S1

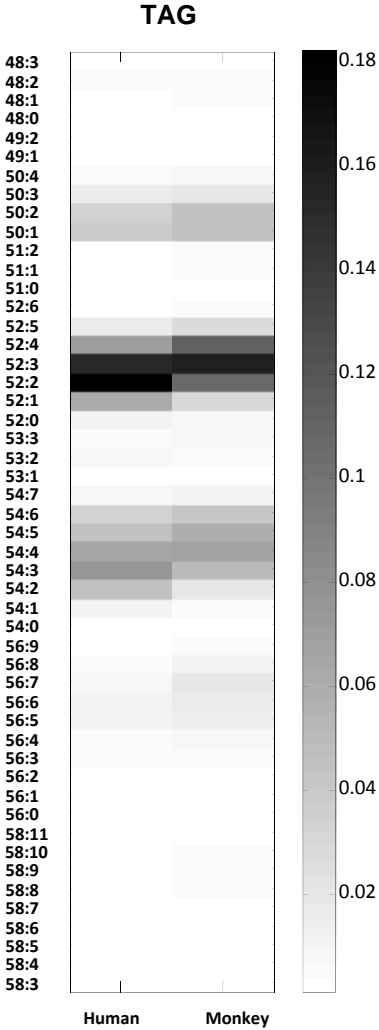

Supplement: pone.0019731.s001.pdf [file pone.0019731.s001.pdf]
