# Supplementary material for: Comparative Plasma Lipidome between Human and Cynomolgus Monkey: Are Plasma Polar Lipids Good Biomarkers for Diabetic Monkeys?
Source: PubMed Central journal article supplement (PMC3087804; doi:10.1371/journal.pone.0019731), 2011-05-04
Supplement: pone.0019731.s004.pdf [file pone.0019731.s004.pdf]

# Table S1

|             | <b>Normal monkey (n=8)</b> | <b>Diabetic monkey (n=8)</b> | <b>Healthy human volunteers (n=10)</b> |
|-------------|----------------------------|------------------------------|----------------------------------------|
| Age         | 5.1±0.4                    | 15.8±3.0                     | 39.5±11.5                              |
| Body weight | 4.9±0.4                    | 8.5±2.1                      | 67.6±12.4                              |
| Gender      | 8M                         | 5F, 3M                       | 5F, 5M                                 |

M, male; F, female. Values are mean ± standard deviation
