# Supplementary material for: Comparative Plasma Lipidome between Human and Cynomolgus Monkey: Are Plasma Polar Lipids Good Biomarkers for Diabetic Monkeys?
Source: PubMed Central journal article supplement (PMC3087804; doi:10.1371/journal.pone.0019731), 2011-05-04
Supplement: pone.0019731.s005.pdf [file pone.0019731.s005.pdf]

**Table S2 p-Value and false discovery rate (FDR) between human and monkey plasma lipids**

|              | Student T-TEST | FDR         |                   | Student T-TEST | FDR         |
|--------------|----------------|-------------|-------------------|----------------|-------------|
| PE32:2       | 0.06244449     | 0.011741699 | PI 32:1           | 0.60131203     | 0.091233549 |
| PE32:1       | 0.042680072    | 0.008383586 | PI 34:3           | 0.214936508    | 0.035553407 |
| PE34p:2      | 0.007017544    | 0.001754386 | PI 34:2           | 0.018193682    | 0.004084296 |
| PE34p:1      | 0.003582239    | 0.000961089 | PI 34:1           | 0.047509097    | 0.009168422 |
| PE34:2       | 0.003062462    | 0.00083178  | PI 36:4           | 0.00099892     | 0.000309525 |
| PE34:1       | 0.02111043     | 0.00455323  | PI 36:3           | 0.004757231    | 0.001245941 |
| PE36p:3      | 0.002622527    | 0.000730324 | PI 36:2           | 0.01001731     | 0.002319798 |
| PE36p:2      | 2.52134E-05    | 1.45972E-05 | PI 36:1           | 0.484689762    | 0.07509278  |
| PE36p:1      | 0.038695222    | 0.007739044 | PI 38:5           | 0.366072339    | 0.057939507 |
| PE36:4       | 0.000535395    | 0.000181211 | PI 38:4           | 0.001592075    | 0.00047332  |
| PE36:3       | 5.0297E-05     | 2.57334E-05 | PI 38:3           | 0.000100549    | 4.51444E-05 |
| PE36:2       | 0.006445454    | 0.001668235 | PI 40:6           | 0.000842788    | 0.000272667 |
| PE36:1       | 0.000180717    | 7.22868E-05 | PI 40:5           | 0.03404033     | 0.006934141 |
| PE38p:6      | 0.652170759    | 0.098272306 | PI 40:4           | 0.045768872    | 0.008910754 |
| PE38p:5      | 7.73549E-05    | 3.69958E-05 | LysoPS 16:1       | 0.391003847    | 0.061443462 |
| PE38p:4      | 0.001140596    | 0.000348515 | LysoPS 16:0       | 0.990709728    | 0.142454994 |
| PE38:7       | 0.000230587    | 8.74639E-05 | LysoPS 18:1       | 0.079151519    | 0.014391185 |
| PE38:6       | 0.004430878    | 0.001174449 | LysoPS 18:0       | 0.048012756    | 0.009185049 |
| PE38:5       | 0.000118599    | 5.01766E-05 | PS 34:1           | 0.245735363    | 0.040045763 |
| PE38:4       | 0.099360329    | 0.017628446 | PS 36:2           | 0.02228826     | 0.004760599 |
| PE40p:6      | 0.000248291    | 9.25832E-05 | PS 36:1           | 0.03489882     | 0.007043799 |
| PE40p:5      | 0.440477301    | 0.068726955 | PS 38:5           | 0.010909392    | 0.002500069 |
| PE40p:4      | 0.102896298    | 0.01796602  | PS 38:4           | 0.012018712    | 0.002725893 |
| PE40:6       | 0.103141162    | 0.017866973 | PS 38:3           | 0.006903602    | 0.001745738 |
| PE40:5       | 0.000429775    | 0.000157584 | PS 40:7           | 0.009294725    | 0.002222652 |
| PE40:4       | 0.000161765    | 6.59042E-05 | PS 40:6           | 9.42312E-05    | 4.31893E-05 |
| PE42p:3      | 0.060199577    | 0.011417161 | PS 40:5           | 0.001240958    | 0.000373987 |
| PE42p:2      | 0.075401795    | 0.013823662 | PG32:1            | 0.000112823    | 4.86688E-05 |
| PE42:9       | 0.806284045    | 0.118254993 | PG34:2            | 0.008913552    | 0.002154925 |
| PE42:8       | 0.097952512    | 0.017519961 | PG34:1            | 0.074248142    | 0.013726547 |
| PE42:7       | 0.319154463    | 0.051251082 | PG36:4            | 0.10007113     | 0.017612519 |
| LysoPC16e:0  | 0.018625108    | 0.004138913 | PG36:3            | 0.023925845    | 0.005013034 |
| LysoPC 16:1  | 0.033129194    | 0.00681161  | PG36:2            | 0.002980261    | 0.000819572 |
| Lyso PC 16:0 | 1.71918E-07    | 1.99063E-07 | PG36:1            | 0.018921989    | 0.004162837 |
| Lyso PC 18:2 | 1.73961E-07    | 1.91357E-07 | PA32:3            | 0.000851923    | 0.000271628 |
| LysoPC 18:1  | 0.137960446    | 0.023347152 | PA32:2            | 0.000860889    | 0.002500565 |
| LysoPC 18:0  | 0.338170846    | 0.053911294 | PA32:1            | 0.002544248    | 0.000717608 |
| LysoPC20:0   | 0.274965615    | 0.044479732 | PA32:0            | 0.009604177    | 0.002247786 |
| SM18/16:0    | 4.56658E-05    | 2.51162E-05 | PA34:2            | 2.62244E-06    | 2.06049E-06 |
| SM18/18:1    | 0.174801354    | 0.029133559 | PA34:1            | 2.93679E-05    | 1.65665E-05 |
| SM18/18:0    | 0.080747877    | 0.014561093 | PA36:2            | 1.35E-07       | 1.64999E-07 |
| SM18/20:1    | 0.041373363    | 0.008200126 | PA36:1            | 5.68464E-06    | 4.16874E-06 |
| SM18/20:0    | 1.67861E-06    | 1.36775E-06 | PA38:4            | 0.000487279    | 0.000170161 |
| SM18/22:1    | 6.2869E-06     | 4.46167E-06 | LPA16:1           | 0.530944615    | 0.081683787 |
| SM18/22:0    | 2.40449E-07    | 2.51899E-07 | LPA16:0           | 0.107335951    | 0.018448367 |
| SM18/24:1    | 0.000191374    | 7.51826E-05 | LPA18:1           | 0.120285004    | 0.020513722 |
| SM18/24:0    | 0.821393472    | 0.119673221 | LPA18:0           | 0.065636747    | 0.01223736  |
| PC34:2       | 0.007474822    | 0.001847709 | GM3 18:1/16:0     | 7.14812E-06    | 4.62525E-06 |
| PC34:1       | 5.79049E-09    | 1.06159E-08 | GM3 18:0/16:0     | 1.0448E-06     | 9.19423E-07 |
| PC36:4p      | 0.020259485    | 0.004412957 | GM3 18:1/18:1     | 0.002004791    | 0.000588072 |
| PC36:3p      | 0.000497013    | 0.000170848 | GM3 18:1/18:0     | 0.850235934    | 0.123060464 |
| PC36:2p      | 0.002333116    | 0.000666605 | GM3 18:0/18:0     | 0.798877009    | 0.118751988 |
| PC36:1p      | 0.009503018    | 0.002248026 | GM3 18:1/20:1     | 1.71528E-05    | 1.01989E-05 |
| PC36:0p      | 2.56138E-13    | 8.05006E-13 | GM3 18:1/20:0     | 4.78733E-05    | 2.50765E-05 |
| PC36:5       | 6.30302E-16    | 3.46666E-15 | GM3 18:0/20:0     | 1.02103E-06    | 9.35945E-07 |
| PC36:4       | 9.46246E-09    | 1.60134E-08 | GM3 18:1/22:1     | 1.26049E-05    | 7.703E-06   |
| PC36:3       | 3.32885E-15    | 1.46469E-14 | GM3 18:1/22:0     | 1.00949E-05    | 6.34536E-06 |
| PC36:2       | 6.99979E-06    | 4.66653E-06 | GM3 18:0/22:0     | 9.16829E-05    | 4.29154E-05 |
| PC36:1       | 0.713590307    | 0.106795828 | GM3 18:1/24:1     | 1.77822E-08    | 2.60806E-08 |
| PC38:4p      | 7.99604E-08    | 1.03478E-07 | GM3 18:1/24:0     | 1.46423E-06    | 1.23896E-06 |
| PC38:3p      | 6.63176E-06    | 4.55933E-06 | GM3 18:0/24:0     | 3.58434E-07    | 3.58434E-07 |
| PC38:2p      | 1.84087E-18    | 2.02496E-17 | Cer d18:1/16:0    | 0.803690025    | 0.118665641 |
| PC38:6       | 6.21573E-05    | 3.10786E-05 | Cer d18:1/18:0    | 0.149224727    | 0.025060641 |
| PC38:5       | 1.55634E-10    | 4.27993E-10 | Cer d18:0/18:0    | 0.007549298    | 0.001845384 |
| PC38:4       | 0.590766693    | 0.090256023 | Cer d18:1/20:0    | 0.023155237    | 0.004898223 |
| PC38:3       | 0.000439879    | 0.000156086 | Cer d18:1/22:0    | 0.026134128    | 0.005424064 |
| PC40:4p      | 3.61564E-07    | 3.45844E-07 | Cer d18:1/24:1    | 0.000108983    | 4.79526E-05 |
| PC40:3p      | 3.72785E-15    | 1.36688E-14 | Cer d18:1/24:0    | 7.62823E-08    | 1.04888E-07 |
| PC40:2p      | 1.48667E-18    | 3.27068E-17 | Cer d18:0/24:0    | 0.221994348    | 0.036446833 |
| PC40:1p      | 3.32047E-16    | 2.43501E-15 | GluCer d18:1/16:0 | 0.000225358    | 8.69802E-05 |
| PC40:7       | 0.000759928    | 0.000249529 | GluCer d18:1/18:0 | 6.45457E-05    | 3.15557E-05 |
| PC40:6       | 0.00014526     | 6.02967E-05 | GluCer d18:1/20:0 | 5.40095E-10    | 1.32023E-09 |
| PC40:5       | 0.000607098    | 0.000202366 | GluCer d18:1/22:0 | 2.32303E-09    | 4.64606E-09 |
| LysoPI 16:1  | 0.000436776    | 0.000157526 | GluCer d18:1/24:1 | 1.72837E-08    | 2.716E-08   |
| LysoPI 16:0  | 0.002247243    | 0.000650518 | GluCer d18:1/24:0 | 7.33067E-10    | 1.61275E-09 |
| LysoPI 18:1  | 4.7337E-05     | 2.54004E-05 | GluCer d18:0/24:1 | 2.9949E-06     | 2.27199E-06 |
| LysoPI 18:0  | 0.006720444    | 0.001719183 |                   |                |             |
