# Supplementary material for: Comparative Plasma Lipidome between Human and Cynomolgus Monkey: Are Plasma Polar Lipids Good Biomarkers for Diabetic Monkeys?
Source: PubMed Central journal article supplement (PMC3087804; doi:10.1371/journal.pone.0019731), 2011-05-04
Supplement: pone.0019731.s006.pdf [file pone.0019731.s006.pdf]

**Table S3. p-Value and false discovery rate (FDR) between diabetic and healthy monkey plasma (fasting)**

|                   | Student T-TEST | FDR         |             | Student T-TEST | FDR         |
|-------------------|----------------|-------------|-------------|----------------|-------------|
| Cer d18:1/16:0    | 0.039477968    | 0.035226494 | LysoPS 16:1 | 0.508124004    | 0.235769538 |
| Cer d18:1/18:0    | 0.448338094    | 0.218517727 | LysoPS 16:0 | 0.331975049    | 0.178282897 |
| Cer d18:0/18:1    | 0.794586487    | 0.326851179 | LysoPS 18:1 | 0.132403777    | 0.084389221 |
| Cer d18:1/20:0    | 0.928453374    | 0.366328542 | LysoPS 18:0 | 0.053592498    | 0.042004931 |
| Cer d18:1/22:0    | 0.650333803    | 0.283604215 | PS 34:1     | 0.040875269    | 0.035920691 |
| Cer d18:1/24:1    | 0.211510477    | 0.123915229 | PS 36:2     | 0.109995487    | 0.071682452 |
| Cer d18:1/24:0    | 0.534126365    | 0.242026009 | PS 36:1     | 0.182730943    | 0.111567544 |
| Cer d18:0/24:0    | 0.975137711    | 0.372092021 | PS 38:5     | 0.171662264    | 0.105919269 |
| GluCer d18:1/16:0 | 3.15786E-05    | 0.000183156 | PS 38:4     | 0.066084838    | 0.047911507 |
| GluCer d18:1/18:0 | 4.7615E-05     | 0.000212436 | PS 38:3     | 0.081497785    | 0.056950259 |
| GluCer d18:1/20:0 | 0.000721957    | 0.002093675 | PS 40:7     | 0.405848891    | 0.202924446 |
| GluCer d18:1/22:0 | 0.0017423      | 0.003484599 | PS 40:6     | 0.224923123    | 0.125437896 |
| GluCer d18:1/24:1 | 0.001480235    | 0.003302062 | PS 40:5     | 0.970470537    | 0.375248608 |
| GluCer d18:1/24:0 | 0.003346092    | 0.005544952 | PE32:2      | 0.205239884    | 0.121468503 |
| GluCer d18:0/24:1 | 0.034001509    | 0.031807863 | PE32:1      | 0.484459825    | 0.226602176 |
| SM 18/16:0        | 1.45875E-05    | 0.000141012 | PE34p:2     | 0.368454781    | 0.194276157 |
| SM 18/18:1        | 0.012741059    | 0.017594796 | PE34p:1     | 0.454503265    | 0.219676578 |
| SM 18/18:0        | 3.03588E-05    | 0.000195645 | PE34:2      | 0.385097332    | 0.195926713 |
| SM 18/20:1        | 0.024817336    | 0.026171009 | PE34:1      | 0.056138908    | 0.043414089 |
| SM 18/20:0        | 0.000232867    | 0.000750348 | PE36p:3     | 0.000126051    | 0.000430055 |
| SM 18/22:1        | 0.728851718    | 0.306328983 | PE36p:2     | 0.061065423    | 0.045997332 |
| SM 18/22:0        | 0.013655884    | 0.018419564 | PE36p:1     | 0.002658954    | 0.004673313 |
| SM 18/24:1        | 0.002683544    | 0.00457781  | PE36:4      | 1.20994E-05    | 0.000140353 |
| SM 18/24:0        | 0.015050806    | 0.018977103 | PE36:3      | 0.714318295    | 0.302412125 |
| GM3 18:1/16:0     | 0.034236187    | 0.031519029 | PE36:2      | 4.7311E-05     | 0.00022867  |
| GM3 18:0/16:0     | 0.103728699    | 0.069152466 | PE36:1      | 9.29502E-05    | 0.000336944 |
| GM3 18:1/18:1     | 0.004043041    | 0.00633774  | PE38p:6     | 0.000632251    | 0.00193003  |
| GM3 18:1/18:0     | 0.001215247    | 0.002819373 | PE38p:5     | 0.136107591    | 0.085806959 |
| GM3 18:0/18:0     | 0.001919154    | 0.003710365 | PE38p:4     | 0.470921111    | 0.222060361 |
| GM3 18:1/20:1     | 0.062939681    | 0.04620888  | PE38:7      | 6.32803E-05    | 0.000262161 |
| GM3 18:1/20:0     | 0.024224752    | 0.026019178 | PE38:6      | 8.8085E-06     | 0.000127723 |
| GM3 18:0/20:0     | 0.093347112    | 0.062955029 | PE38:5      | 0.010830686    | 0.015321459 |
| GM3 18:1/22:1     | 0.293180428    | 0.16041948  | PE38:4      | 1.76664E-05    | 0.000146379 |
| GM3 18:1/22:0     | 0.835646834    | 0.338933681 | PE40p:6     | 1.86946E-06    | 5.42144E-05 |
| GM3 18:0/22:0     | 0.1507672      | 0.094026856 | PE40p:5     | 0.001191775    | 0.002880122 |
| GM3 18:1/24:1     | 0.013865184    | 0.018276833 | PE40p:4     | 0.001699121    | 0.003519608 |
| GM3 18:1/24:0     | 0.0068709      | 0.010487163 | PE40:6      | 6.47499E-05    | 0.000250366 |
| GM3 18:0/24:0     | 0.242920266    | 0.134184528 | PE40:5      | 0.000735493    | 0.002031362 |
| PG32:1            | 0.047804289    | 0.03850901  | PE40:6      | 0.111601425    | 0.071920918 |
| PG34:2            | 0.062876541    | 0.046754351 | PE42p:3     | 0.021833754    | 0.024830543 |
| PG34:1            | 0.04309326     | 0.037304613 | PE42p:2     | 0.016433602    | 0.019857269 |
| PG36:4            | 0.030682622    | 0.031220913 | PE42:9      | 0.445023777    | 0.2187405   |
| PG36:3            | 0.024110072    | 0.026384607 | PE42:8      | 0.187059928    | 0.113015373 |
| PG36:2            | 0.003347775    | 0.005393638 | PE42:7      | 0.213477131    | 0.122590828 |
| PG36:1            | 0.029923287    | 0.030991976 | LPC16e:0    | 0.002220597    | 0.004024832 |
| LPA16:1           | 0.668172162    | 0.289208846 | LPC16:1     | 0.008556095    | 0.012406338 |
| LPA16:0           | 0.974123233    | 0.37416654  | LPC16:0     | 0.05798367     | 0.044250695 |
| LPA18:1           | 0.37877812     | 0.194417088 | LPC18:2     | 0.044060283    | 0.03758083  |
| LPA18:0           | 0.087933515    | 0.060715998 | LPC18:1     | 0.001145417    | 0.002888443 |
| LysoPI 16:1       | 0.031861701    | 0.031321672 | LPC18:0     | 0.901040611    | 0.35794764  |
| LysoPI 16:0       | 0.106189413    | 0.069988477 | LPC20:0     | 0.001081914    | 0.002852319 |
| LysoPI 18:1       | 0.20401664     | 0.121989331 | PC34:2      | 0.212255652    | 0.123108278 |
| LysoPI 18:0       | 0.871214862    | 0.348485945 | PC34:1      | 0.001687886    | 0.00362583  |
| PI 32:1           | 0.080460803    | 0.0569113   | PC36:4p     | 0.001982825    | 0.003709801 |
| PI 34:3           | 0.044405447    | 0.036793085 | PC36:3p     | 0.007179827    | 0.010677691 |
| PI 34:2           | 0.604269695    | 0.27168715  | PC36:2p     | 0.033559519    | 0.031909051 |
| PI 34:1           | 0.047208762    | 0.038564904 | PC36:1p     | 0.733088254    | 0.305892941 |
| PI 36:4           | 0.031477069    | 0.031477069 | PC36:0p     | 0.608807114    | 0.271621635 |
| PI 36:3           | 0.67703017     | 0.290872221 | PC36:5      | 0.024005473    | 0.026775335 |
| PI 36:2           | 0.696049563    | 0.296844667 | PC36:4      | 0.015524774    | 0.019158232 |
| PI 36:1           | 0.019387332    | 0.022948271 | PC36:3      | 4.13178E-05    | 0.000217858 |
| PI 38:5           | 0.221167217    | 0.125761751 | PC36:2      | 0.021601671    | 0.025057938 |
| PI 38:4           | 0.456501435    | 0.21881887  | PC36:1      | 6.33316E-07    | 3.67323E-05 |
| PI 38:3           | 0.62612994     | 0.275117701 | PC38:4p     | 0.014465948    | 0.018644999 |
| PI 40:6           | 0.328438764    | 0.178032227 | PC38:3p     | 0.368880335    | 0.192748283 |
| PI 40:5           | 0.468221312    | 0.222597017 | PC38:2p     | 0.372850938    | 0.193083522 |
| PI 40:4           | 0.531094721    | 0.242547195 | PC38:6      | 0.406995834    | 0.201758619 |
| PA32:3            | 0.401391436    | 0.202440898 | PC38:5      | 4.68441E-06    | 9.05653E-05 |
| PA32:2            | 0.949751357    | 0.372199856 | PC38:4      | 0.822106095    | 0.335789814 |
| PA32:1            | 0.524214431    | 0.241305056 | PC38:3      | 0.044342829    | 0.037273682 |
| PA32:0            | 0.965099037    | 0.375676135 | PC40:4p     | 0.06937839     | 0.049678353 |
| PA34:2            | 0.351270352    | 0.186914499 | PC40:3p     | 0.034459285    | 0.031228727 |
| PA34:1            | 0.222066464    | 0.125047135 | PC40:2p     | 0.088879602    | 0.060647258 |
| PA36:2            | 0.853875753    | 0.343922178 | PC40:1p     | 0.98059717     | 0.371729646 |
| PA36:1            | 0.050169978    | 0.039861078 | PC40:7      | 0.756578836    | 0.313439803 |
| PA38:4            | 0.033197928    | 0.03209133  | PC40:6      | 0.616500833    | 0.272954567 |
|                   |                |             | PC40:5      | 2.27141E-05    | 0.000164677 |
