# Supplementary material for: Comparative Plasma Lipidome between Human and Cynomolgus Monkey: Are Plasma Polar Lipids Good Biomarkers for Diabetic Monkeys?
Source: PubMed Central journal article supplement (PMC3087804; doi:10.1371/journal.pone.0019731), 2011-05-04
Supplement: pone.0019731.s007.pdf [file pone.0019731.s007.pdf]

**Table S4. p-Value and false discovery rate (FDR) between diabetic and healthy monkey plasma (fed)**

|                   | Student T-TEST | FDR         |             | Student T-TEST | FDR         |
|-------------------|----------------|-------------|-------------|----------------|-------------|
| Cer d18:1/16:0    | 0.208759069    | 0.13325047  | LysoPS 16:1 | 0.76080797     | 0.323748072 |
| Cer d18:1/18:0    | 0.034952082    | 0.044619679 | LysoPS 16:0 | 0.488128779    | 0.238111599 |
| Cer d18:0/18:1    | 0.081058969    | 0.07152262  | LysoPS 18:1 | 0.215145164    | 0.134465728 |
| Cer d18:1/20:0    | 0.174689538    | 0.115179915 | LysoPS 18:0 | 0.172380565    | 0.116211617 |
| Cer d18:1/22:0    | 0.666225848    | 0.293923168 | PS 34:1     | 0.171816044    | 0.117147303 |
| Cer d18:1/24:1    | 0.128920965    | 0.092086403 | PS 36:2     | 0.234347972    | 0.144957509 |
| Cer d18:1/24:0    | 0.99351324     | 0.389613035 | PS 36:1     | 0.237633672    | 0.145490003 |
| Cer d18:0/24:0    | 0.199569782    | 0.128754698 | PS 38:5     | 0.572334146    | 0.268281631 |
| GluCer d18:1/16:0 | 5.58216E-05    | 0.000478471 | PS 38:4     | 0.118248885    | 0.087591767 |
| GluCer d18:1/18:0 | 9.83407E-05    | 0.000590044 | PS 38:3     | 0.081559141    | 0.070920992 |
| GluCer d18:1/20:0 | 0.006181677    | 0.014265409 | PS 40:7     | 0.173485442    | 0.115656961 |
| GluCer d18:1/22:0 | 0.112566406    | 0.085493473 | PS 40:6     | 0.510016353    | 0.246782106 |
| GluCer d18:1/24:1 | 7.07662E-05    | 0.000471774 | PS 40:5     | 0.274960469    | 0.155638001 |
| GluCer d18:1/24:0 | 0.003130608    | 0.008538021 | PE32:2      | 0.659030876    | 0.292902612 |
| GluCer d18:0/24:1 | 0.124769835    | 0.091295001 | PE32:1      | 0.168792459    | 0.116408592 |
| SM 18/16:0        | 0.006107108    | 0.014657059 | PE34p:2     | 0.862596338    | 0.349701218 |
| SM 18/18:1        | 0.013559193    | 0.023927987 | PE34p:1     | 0.941173996    | 0.371516051 |
| SM 18/18:0        | 0.000238164    | 0.000893116 | PE34:2      | 0.103696352    | 0.082957081 |
| SM 18/20:1        | 0.125804604    | 0.090943087 | PE34:1      | 0.372449983    | 0.190999991 |
| SM 18/20:0        | 0.009037076    | 0.017491115 | PE36p:3     | 1.48109E-05    | 0.000296219 |
| SM 18/22:1        | 0.81394348     | 0.336804199 | PE36p:2     | 0.011456607    | 0.020830195 |
| SM 18/22:0        | 0.269525748    | 0.155495624 | PE36p:1     | 0.005062918    | 0.013207612 |
| SM 18/24:1        | 0.010510845    | 0.019707833 | PE36:4      | 0.000183996    | 0.000735983 |
| SM 18/24:0        | 0.249310875    | 0.1510975   | PE36:3      | 0.523888242    | 0.251466356 |
| GM3 18:1/16:0     | 0.07210653     | 0.068672886 | PE36:2      | 0.000132185    | 0.000721007 |
| GM3 18:0/16:0     | 0.09663899     | 0.079429307 | PE36:1      | 2.74533E-05    | 0.00032944  |
| GM3 18:1/18:1     | 0.005468983    | 0.013672457 | PE38p:6     | 0.020025104    | 0.02730696  |
| GM3 18:1/18:0     | 0.000831603    | 0.00293507  | PE38p:5     | 0.585925948    | 0.27042736  |
| GM3 18:0/18:0     | 0.002900197    | 0.008286277 | PE38p:4     | 0.066329189    | 0.071066988 |
| GM3 18:1/20:1     | 0.443145972    | 0.221572986 | PE38:7      | 2.09692E-05    | 0.000314538 |
| GM3 18:1/20:0     | 0.013959184    | 0.023930031 | PE38:6      | 5.39618E-05    | 0.000539618 |
| GM3 18:0/20:0     | 0.297392264    | 0.163702163 | PE38:5      | 0.16539322     | 0.115390619 |
| GM3 18:1/22:1     | 0.894676327    | 0.357870531 | PE38:4      | 0.000153349    | 0.000707766 |
| GM3 18:1/22:0     | 0.672669135    | 0.294599621 | PE40p:6     | 7.74566E-06    | 0.00023237  |
| GM3 18:0/22:0     | 0.069267533    | 0.069267533 | PE40p:5     | 0.095127478    | 0.079272898 |
| GM3 18:1/24:1     | 0.044349937    | 0.052176396 | PE40p:4     | 0.084460612    | 0.07239481  |
| GM3 18:1/24:0     | 0.18066045     | 0.117822033 | PE40:6      | 0.000905914    | 0.003019715 |
| GM3 18:0/24:0     | 0.821703282    | 0.335389095 | PE40:5      | 0.018189498    | 0.026618777 |
| PG32:1            | 0.799460988    | 0.335438177 | PE40:6      | 0.015627866    | 0.024042871 |
| PG34:2            | 0.109278352    | 0.085151963 | PE42p:3     | 0.008893357    | 0.017786714 |
| PG34:1            | 0.071564094    | 0.069255575 | PE42p:2     | 0.263324875    | 0.153393131 |
| PG36:4            | 0.783498133    | 0.331055549 | PE42:9      | 0.636247174    | 0.284886794 |
| PG36:3            | 0.068834853    | 0.070001545 | PE42:8      | 0.689404986    | 0.299741298 |
| PG36:2            | 0.160580645    | 0.113351043 | PE42:7      | 0.597145286    | 0.273501658 |
| PG36:1            | 0.322503927    | 0.174326447 | LPC16e:0    | 0.001677382    | 0.005032145 |
| LysoPI 16:1       | 0.538782995    | 0.254543147 | LPC16:1     | 0.042278287    | 0.050733945 |
| LysoPI 16:0       | 0.007219254    | 0.016042786 | LPC16:0     | 0.704705929    | 0.304189609 |
| LysoPI 18:1       | 0.021852125    | 0.029136166 | LPC18:2     | 0.260078631    | 0.15298743  |
| LysoPI 18:0       | 0.039180884    | 0.047976592 | LPC18:1     | 0.01875711     | 0.026795871 |
| LPA16:1           | 0.037351166    | 0.046688958 | LPC18:0     | 0.052255074    | 0.058061193 |
| LPA16:0           | 0.071171933    | 0.07000518  | LPC20:0     | 0.097713461    | 0.07922713  |
| LPA18:1           | 0.056381241    | 0.061506808 | PC34:2      | 0.326832514    | 0.175088847 |
| LPA18:0           | 0.890004968    | 0.358391262 | PC34:1      | 0.018001473    | 0.027002209 |
| PA32:3            | 0.110585094    | 0.085065457 | PC36:4p     | 0.007268237    | 0.015574793 |
| PA32:2            | 0.112967554    | 0.084725665 | PC36:3p     | 0.049336943    | 0.056927242 |
| PA32:1            | 0.252076991    | 0.151246194 | PC36:2p     | 0.07873529     | 0.071577536 |
| PA32:0            | 0.270054142    | 0.154316653 | PC36:1p     | 0.35073228     | 0.182990755 |
| PA34:2            | 0.275790668    | 0.154648972 | PC36:0p     | 0.371736658    | 0.192277582 |
| PA34:1            | 0.014035283    | 0.023392138 | PC36:5      | 0.105967328    | 0.083658417 |
| PA36:2            | 0.326990996    | 0.173623538 | PC36:4      | 0.014060562    | 0.022800912 |
| PA36:1            | 0.289220058    | 0.16067781  | PC36:3      | 6.10349E-05    | 0.000457762 |
| PA38:4            | 0.435062454    | 0.21935922  | PC36:2      | 0.456198453    | 0.224359895 |
| PI 32:1           | 0.32047003     | 0.174801835 | PC36:1      | 0.066839588    | 0.070357461 |
| PI 34:3           | 0.072372594    | 0.067849307 | PC38:4p     | 0.333702164    | 0.175632718 |
| PI 34:2           | 0.008254285    | 0.017077831 | PC38:3p     | 0.25549966     | 0.151781976 |
| PI 34:1           | 0.622713397    | 0.283051544 | PC38:2p     | 0.451574976    | 0.223921476 |
| PI 36:4           | 0.577079426    | 0.268409036 | PC38:6      | 0.087245006    | 0.073728174 |
| PI 36:3           | 0.014073412    | 0.022221177 | PC38:5      | 4.23586E-06    | 0.000254152 |
| PI 36:2           | 0.019535786    | 0.027259236 | PC38:4      | 0.050416778    | 0.057075598 |
| PI 36:1           | 0.809177385    | 0.337157244 | PC38:3      | 0.078516262    | 0.072476549 |
| PI 38:5           | 0.211594807    | 0.133638825 | PC40:4p     | 0.001081673    | 0.00341581  |
| PI 38:4           | 0.079298805    | 0.071013855 | PC40:3p     | 0.000180096    | 0.000771842 |
| PI 38:3           | 0.818863003    | 0.336519043 | PC40:2p     | 0.028057249    | 0.036596412 |
| PI 40:6           | 0.067798606    | 0.070136489 | PC40:1p     | 0.633208114    | 0.285657796 |
| PI 40:5           | 0.529440637    | 0.252114589 | PC40:7      | 0.388325288    | 0.197453536 |
| PI 40:4           | 0.923069343    | 0.366782521 | PC40:6      | 0.733830168    | 0.314498643 |
|                   |                |             | PC40:5      | 0.000140811    | 0.000704057 |
